# Supplementary material
Source: PubMed Central journal article supplement (PMC2998629)
Supplement: mmc1.pdf [file mmc1.pdf]

## Supporting Information

### The *O*-glycosylated linker from the *Trichoderma reesei* Family 7 cellulase is a flexible, disordered protein

Gregg T. Beckham, Yannick J. Bomble, James F. Matthews, Courtney B. Taylor, Michael G. Resch, John M. Yarbrough, Steve R. Decker, Lintao Bu, Xiongce Zhao, Clare McCabe, Jakob Wohlert, Malin Bergensträhle, John W. Brady, William S. Adney, Michael E. Himmel, Michael F. Crowley

#### Additional Methods

Ramachandran dihedral angles of each residue were calculated, excluding end residues, and compared between the two linkers to determine if structural flexibility is impaired by the presence of glycosylation. The lifetimes of protein-protein, protein-sugar, and sugar-sugar hydrogen bonds were also characterized with a threshold value of 3.5 Å and an angle cutoff of 120°. All potential donors and acceptors (O-H---O or N-H---O) were included in the analysis and the hydrogen bonds presented have an occupancy greater than 1%.

Contacts were calculated for protein-protein, protein-sugar, and sugar-sugar interactions to measure the compactness of both structures and to quantify the interactions between the protein and glycosylation. Contacts are defined as non-sequential, heavy atom side chain (for protein) or heavy sugar atoms within 6.5 Å. For glycine, the alpha carbon is used to define a contact. For sugar-sugar contacts and protein-sugar contacts, sequential neighbors were excluded as contacts.

Convergence was measured for the REMD simulations using the transit number and the potential energy autocorrelation (57). The transit number is a metric to determine the efficiency of computation by calculating the number of RE attempts required for a 95% probability that one replica will visit the maximum temperature before visiting the minimum temperature. Transit numbers were calculated over a range of average exchange probability for various numbers of replicas. The average exchange probability can be estimated using the following:

$$P(\text{exchange}) = \min\left(1, \exp\left[-\frac{\varepsilon^2 N_{df}}{1 + \varepsilon}\right]\right) \quad (1)$$

where  $1 + \varepsilon$  represents the constant ratio between temperatures when replica temperatures are distributed exponentially, and  $N_{df}$  represents the number of degrees of freedom, estimated as  $N_{atoms}$  for this simulation. For the glycosylated linker, the average exchange probability equaled 0.088. Using this value in Figure 1a in Abraham and Gready with 16 replicas, the recommended transit number is approximately 1,100 (57). The authors recommend the simulation exceed the transit number by at least two orders of magnitude, which would be 110,000. The glycosylated linker simulation includes 40,000 swap attempts, and based on the error bars presented for Figures 3-5, our results seem to be converged.

The interval between exchanges is important because the transit number metric is a valid model of efficient exchange only when there is a sufficiently long enough interval between exchange attempts to result in independence of replica exchange events. There are various recommendations in literature regarding this number. Many simulations studied in (57) exceed the recommended transit number but exchange too frequently. This can be estimated by the autocorrelation time of the potential energy. The autocorrelation was calculated by

$$c(t) = \frac{1}{c_0(N-t)} \sum_{j=1}^{N-t} (U_j - \bar{U})(U_{j+t} - \bar{U}) \quad (2)$$

where  $c_0$  and  $c(t)$  are the autocorrelation functions at time 0 and  $t$ , respectively,  $N$  represents the number of sample points, and  $U$  represents the potential energy.  $C(t)$  was calculated by analyzing 1.5 ns windows of a 15 ns NVT MD simulation of the glycosylated linker. The time step was 1.5 fs, and data were recorded every 0.15 ps. A suggested exchange interval for REMD was then calculated by the average of the cumulative sums of  $c(t) \cdot \Delta t$  for each window. At long  $t$ , the noise of the simulation can begin to override  $c(t)$ , and thus the data were truncated at 400 ps, where  $c(t)$  shows increased instances of negative values, indicating noise dominance. The average indicates that the interval between swap attempts, or exchange interval, should be 3.5 ps which is on the order of our chosen interval of 3 ps. Based on the above calculations, our simulations with 3 ps/swap and 40,000 swaps per REMD run (for  $120 \cdot 12 \text{ ns} = 1.4 \mu\text{s}$  and  $120 \cdot 16 = 1.92 \mu\text{s}$ ) ensured reasonable mixing and thermodynamic efficiency as defined by Abraham and Gready (57).

Error analysis for the free energy curves shown in Figures 3-5 were calculated using a bootstrapping procedure available from Alan Grossfield. The bins were separated for each distance metric into 1 Å bins, and the number of bootstrapping Monte Carlo simulations were varied in each data set until convergence in the relative error was found.

Table S1. Free energy for the non-glycosylated linker REMD simulations.

| End-to-end distance [Å] | Free energy for the non-glycosylated linker [F/kT] |
|-------------------------|----------------------------------------------------|
| 4                       | 8.09631                                            |
| 5                       | 5.97605                                            |
| 6                       | 5.01542                                            |
| 7                       | 4.10117                                            |
| 8                       | 3.54243                                            |
| 9                       | 3.04574                                            |
| 10                      | 2.66843                                            |
| 11                      | 2.45954                                            |
| 12                      | 2.24507                                            |
| 13                      | 1.9878                                             |
| 14                      | 1.73905                                            |
| 15                      | 1.69994                                            |
| 16                      | 1.62568                                            |
| 17                      | 1.56673                                            |
| 18                      | 1.42021                                            |
| 19                      | 1.32044                                            |
| 20                      | 1.20683                                            |
| 21                      | 1.05189                                            |
| 22                      | 0.890429                                           |
| 23                      | 0.748084                                           |
| 24                      | 0.725661                                           |
| 25                      | 0.647524                                           |
| 26                      | 0.605536                                           |
| 27                      | 0.493353                                           |
| 28                      | 0.409945                                           |
| 29                      | 0.363356                                           |
| 30                      | 0.317449                                           |
| 31                      | 0.281104                                           |
| 32                      | 0.241887                                           |
| 33                      | 0.145732                                           |
| 34                      | 0.130843                                           |
| 35                      | 0.123079                                           |
| 36                      | 0.0608884                                          |
| 37                      | 0                                                  |
| 38                      | 0.0193816                                          |
| 39                      | 0.0638428                                          |
| 40                      | 0.113781                                           |
| 41                      | 0.136765                                           |
| 42                      | 0.184499                                           |
| 43                      | 0.262757                                           |
| 44                      | 0.302818                                           |
| 45                      | 0.309069                                           |
| 46                      | 0.303639                                           |
| 47                      | 0.337695                                           |
| 48                      | 0.391197                                           |
| 49                      | 0.493801                                           |
| 50                      | 0.554036                                           |
| 51                      | 0.671679                                           |
| 52                      | 0.723704                                           |
| 53                      | 0.911093                                           |
| 54                      | 1.10167                                            |
| 55                      | 1.28165                                            |
| 56                      | 1.32718                                            |
| 57                      | 1.50525                                            |
| 58                      | 1.85604                                            |
| 59                      | 2.01587                                            |
| 60                      | 2.15702                                            |
| 61                      | 2.40934                                            |
| 62                      | 2.57797                                            |
| 63                      | 2.60325                                            |
| 64                      | 2.84987                                            |
| 65                      | 3.20429                                            |
| 66                      | 3.46158                                            |
| 67                      | 3.74389                                            |
| 68                      | 4.16667                                            |
| 69                      | 4.15581                                            |
| 70                      | 4.36661                                            |
| 71                      | 5.18155                                            |
| 72                      | 6.10388                                            |
| 73                      | 6.57996                                            |
| 74                      | 6.92624                                            |
| 75                      | 7.20249                                            |
| 76                      | 7.99095                                            |

Table S2. Free energy for the glycosylated linkers REMD simulations.

| End-to-end distance [Å] | Free energy for the glycosylated linker [F/kT] |
|-------------------------|------------------------------------------------|
| 5                       | 10.3006                                        |
| 6                       | 7.528                                          |
| 7                       | 6.53939                                        |
| 8                       | 6.01013                                        |
| 9                       | 6.01013                                        |
| 10                      | 5.01232                                        |
| 11                      | 4.43129                                        |
| 12                      | 4.68381                                        |
| 13                      | 4.6481                                         |
| 14                      | 4.49244                                        |
| 15                      | 4.05836                                        |
| 16                      | 3.97086                                        |
| 17                      | 4.00348                                        |
| 18                      | 3.7048                                         |
| 19                      | 3.55065                                        |
| 20                      | 3.43261                                        |
| 21                      | 3.17852                                        |
| 22                      | 2.71938                                        |
| 23                      | 2.43963                                        |
| 24                      | 2.20133                                        |
| 25                      | 2.03108                                        |
| 26                      | 1.83806                                        |
| 27                      | 1.66312                                        |
| 28                      | 1.5553                                         |
| 29                      | 1.54123                                        |
| 30                      | 1.54579                                        |
| 31                      | 1.53077                                        |
| 32                      | 1.39013                                        |
| 33                      | 1.24866                                        |
| 34                      | 1.10262                                        |
| 35                      | 1.01699                                        |
| 36                      | 0.864941                                       |
| 37                      | 0.754915                                       |
| 38                      | 0.658461                                       |
| 39                      | 0.573417                                       |
| 40                      | 0.459878                                       |
| 41                      | 0.3796                                         |
| 42                      | 0.355141                                       |
| 43                      | 0.368656                                       |
| 44                      | 0.265325                                       |
| 45                      | 0.174754                                       |
| 46                      | 0.126231                                       |
| 47                      | 0.0861615                                      |
| 48                      | 0.0632369                                      |
| 49                      | 0.0249481                                      |
| 50                      | 0.0165736                                      |
| 51                      | 0.0381997                                      |
| 52                      | 0.0282273                                      |
| 53                      | 0                                              |
| 54                      | 0.0511001                                      |
| 55                      | 0.052514                                       |
| 56                      | 0.0794445                                      |
| 57                      | 0.194076                                       |
| 58                      | 0.283145                                       |
| 59                      | 0.292242                                       |
| 60                      | 0.38147                                        |
| 61                      | 0.472843                                       |
| 62                      | 0.628715                                       |
| 63                      | 0.754699                                       |
| 64                      | 0.857071                                       |
| 65                      | 0.969972                                       |
| 66                      | 1.10658                                        |
| 67                      | 1.28504                                        |
| 68                      | 1.59625                                        |
| 69                      | 1.88565                                        |
| 70                      | 2.00279                                        |
| 71                      | 2.11719                                        |
| 72                      | 2.45321                                        |
| 73                      | 2.90917                                        |
| 74                      | 3.08461                                        |
| 75                      | 3.20056                                        |
| 76                      | 3.59128                                        |
| 77                      | 4.25795                                        |
| 78                      | 4.88005                                        |
| 79                      | 5.64663                                        |
| 80                      | 6.27523                                        |
| 81                      | 6.33029                                        |
| 82                      | 7.41021                                        |
| 83                      | 8.50883                                        |

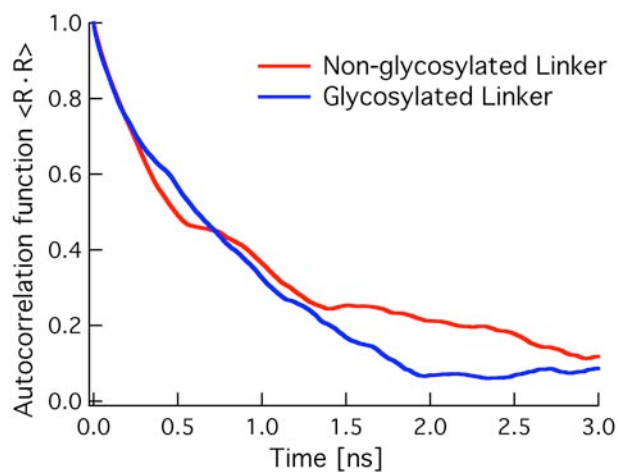

Figure S1. The autocorrelation function of the end-to-end distance ( $R$ ) of the glycosylated and non-glycosylated Cel7A linker in implicit solvent from MD simulation. The autocorrelation time is 2-3 ns.

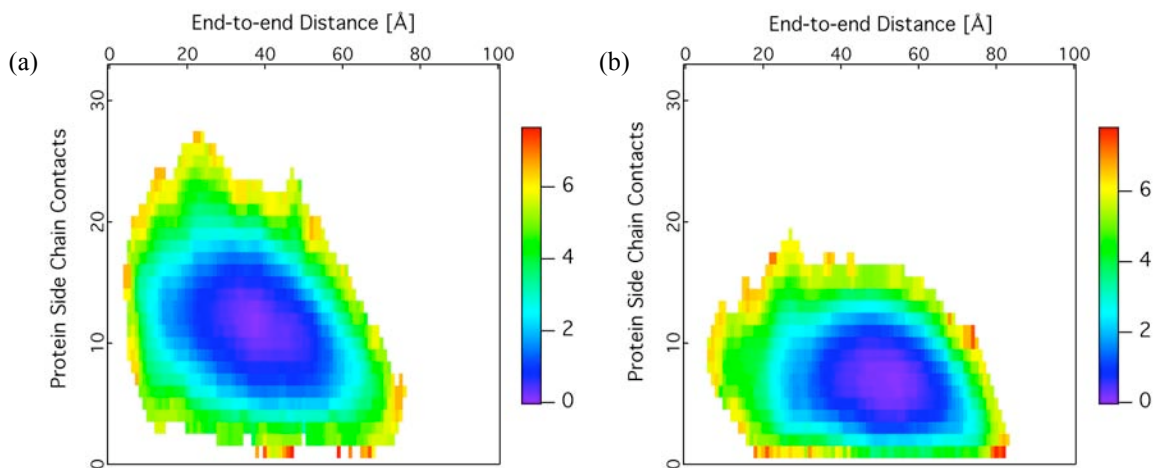

Figure S2. Relative free energy surfaces for the (a) non-glycosylated and (b) glycosylated Cel7A linker as a function of protein side chain contacts and end-to-end distance. The free energy units are dimensionless ( $F/kT$ ). Based on the differences in the minima and shapes of the free energy contours, the non-glycosylated linker is able to maintain more protein side chain contacts by forming a slightly more compact structure, whereas the glycosylation provides extension and reduces the number of side chain contacts.

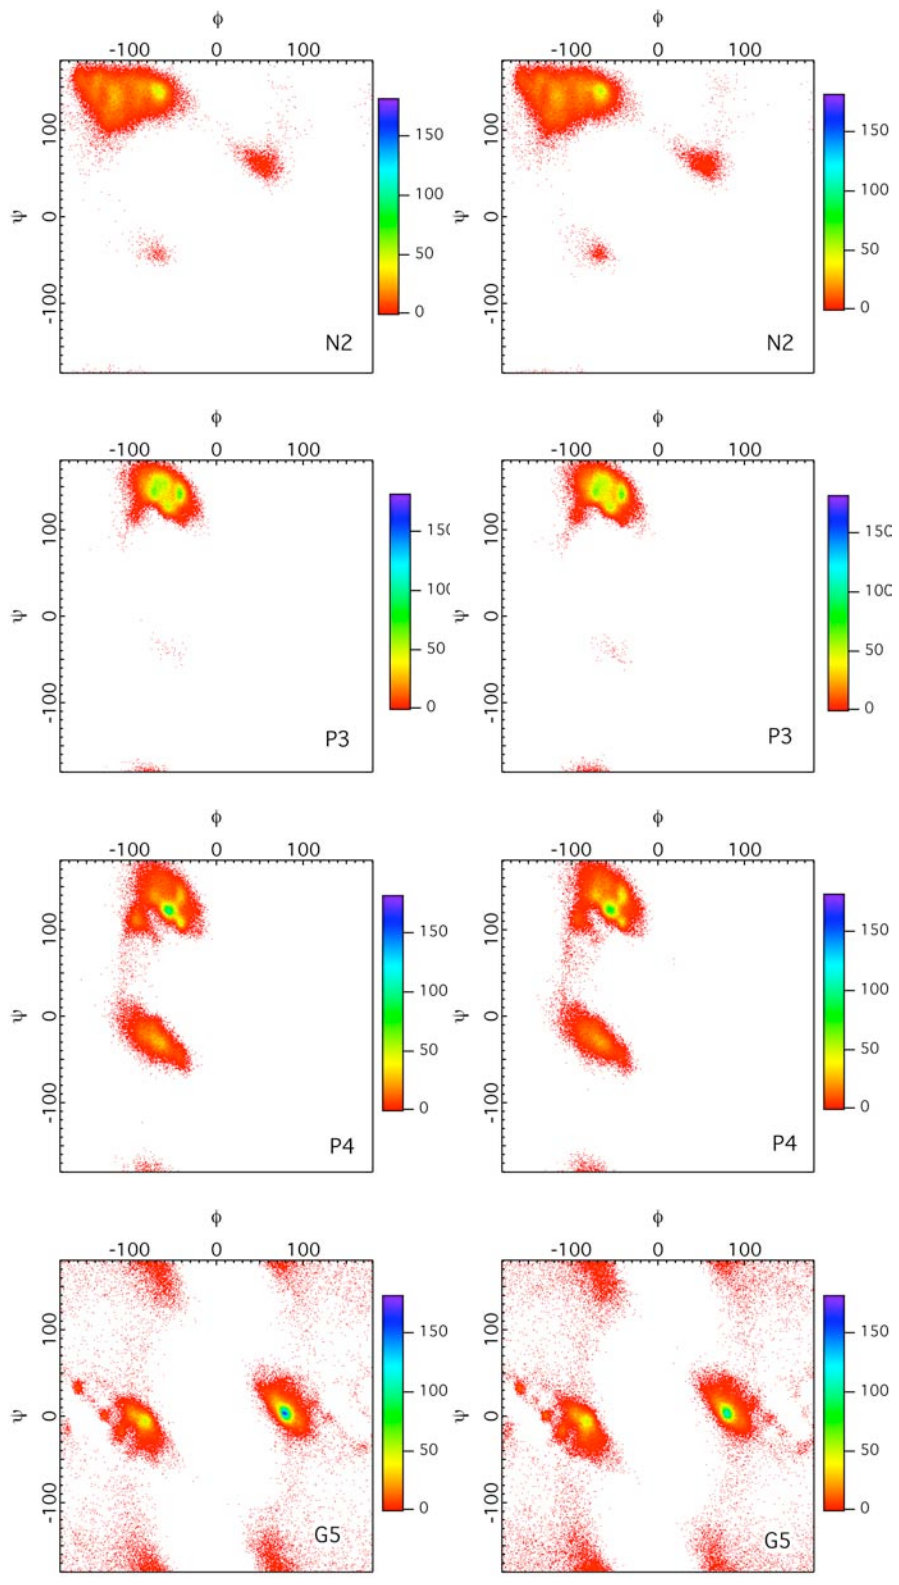

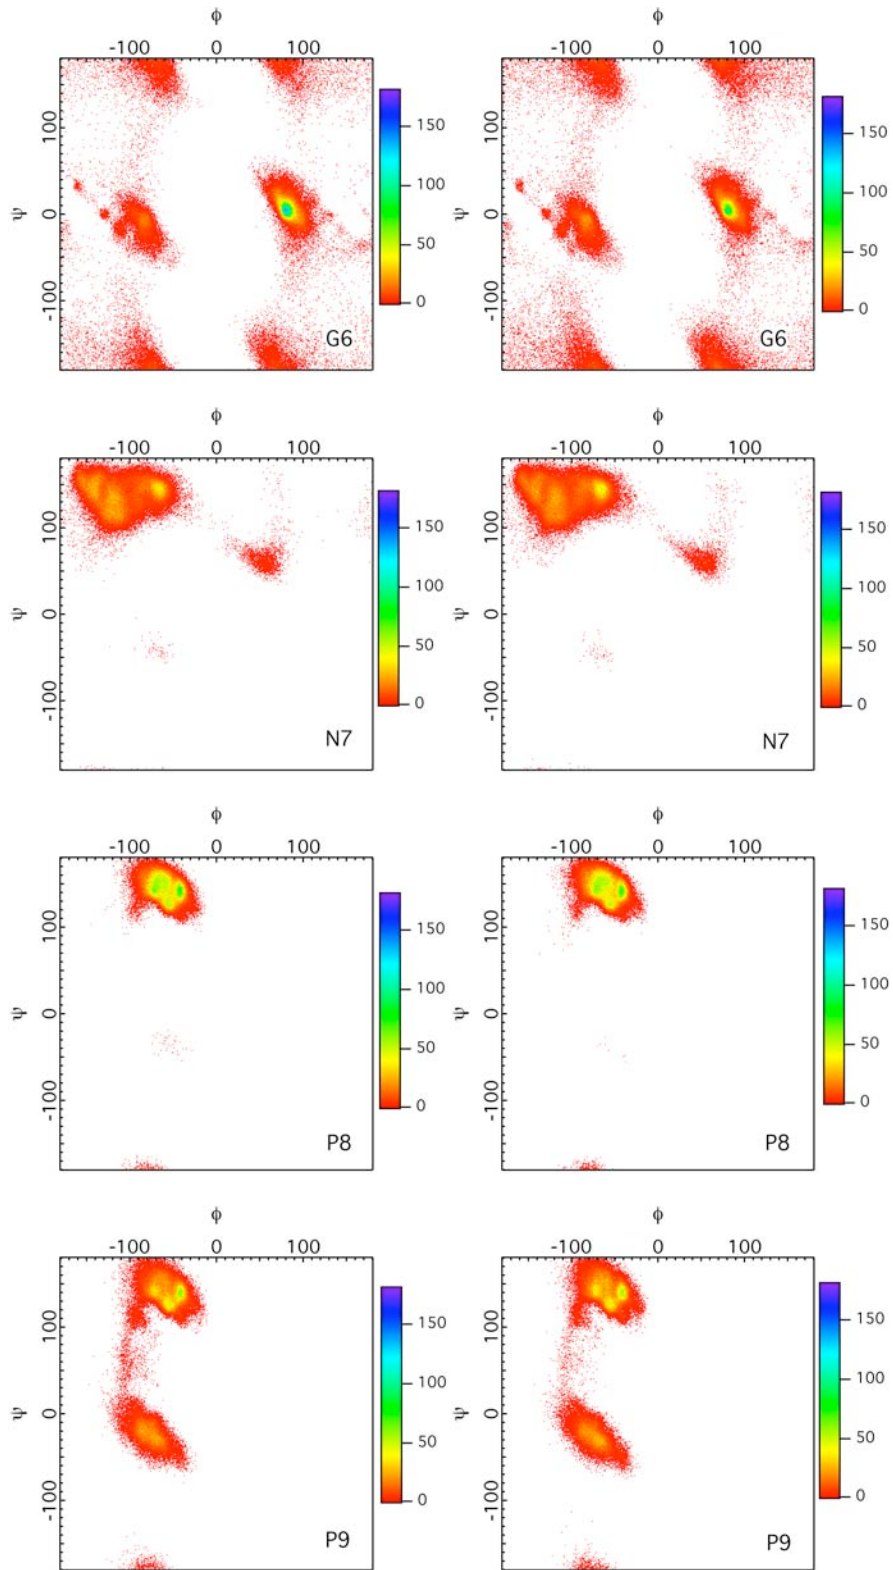

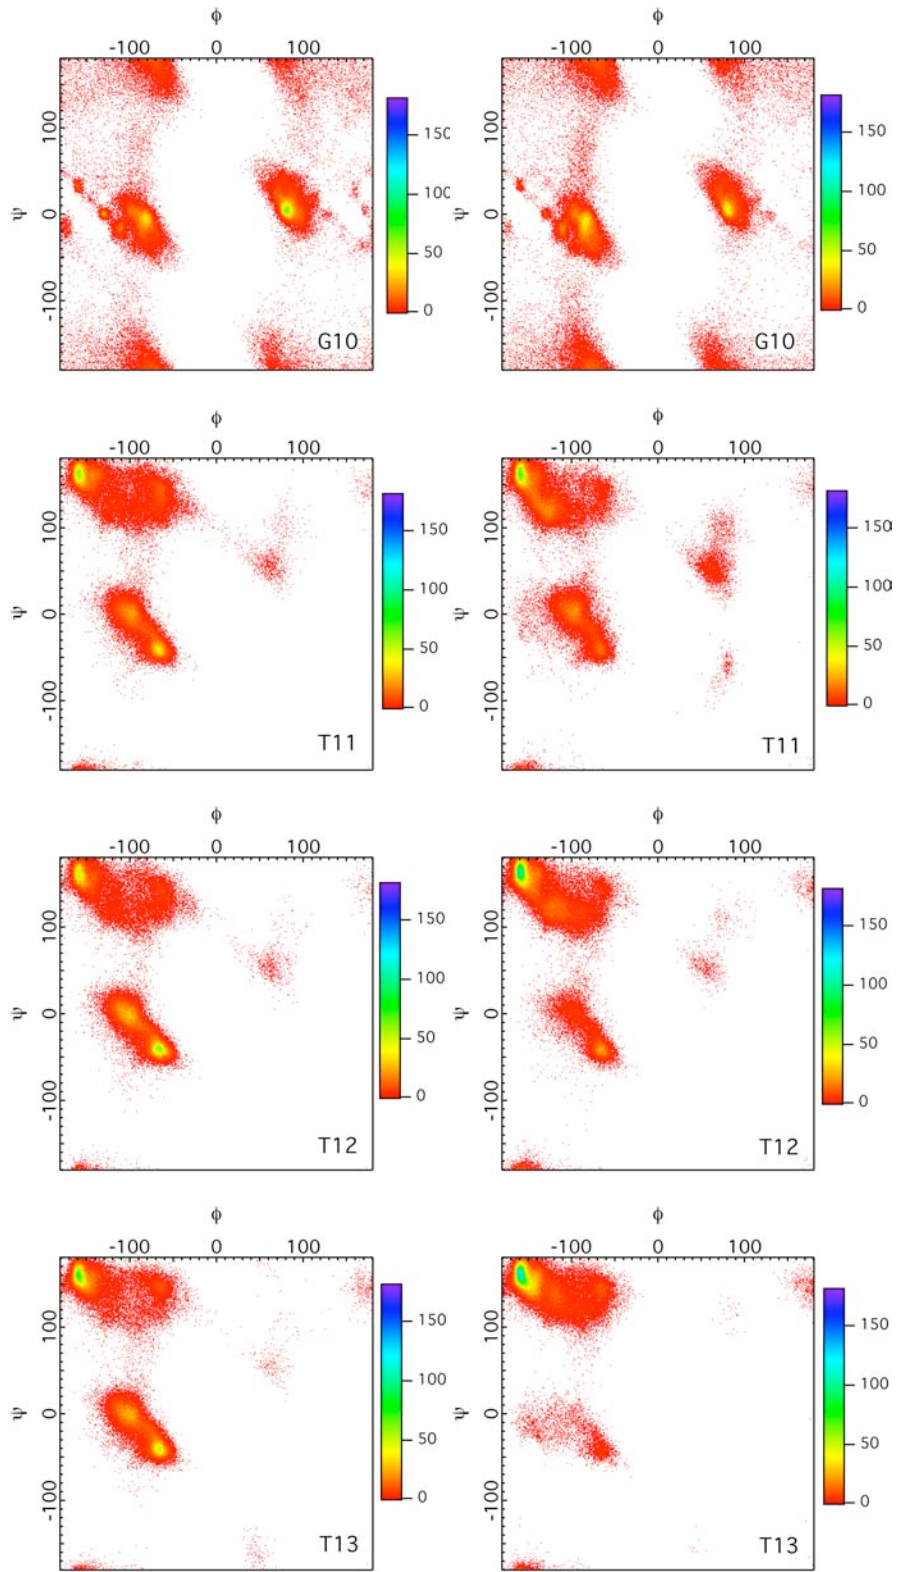



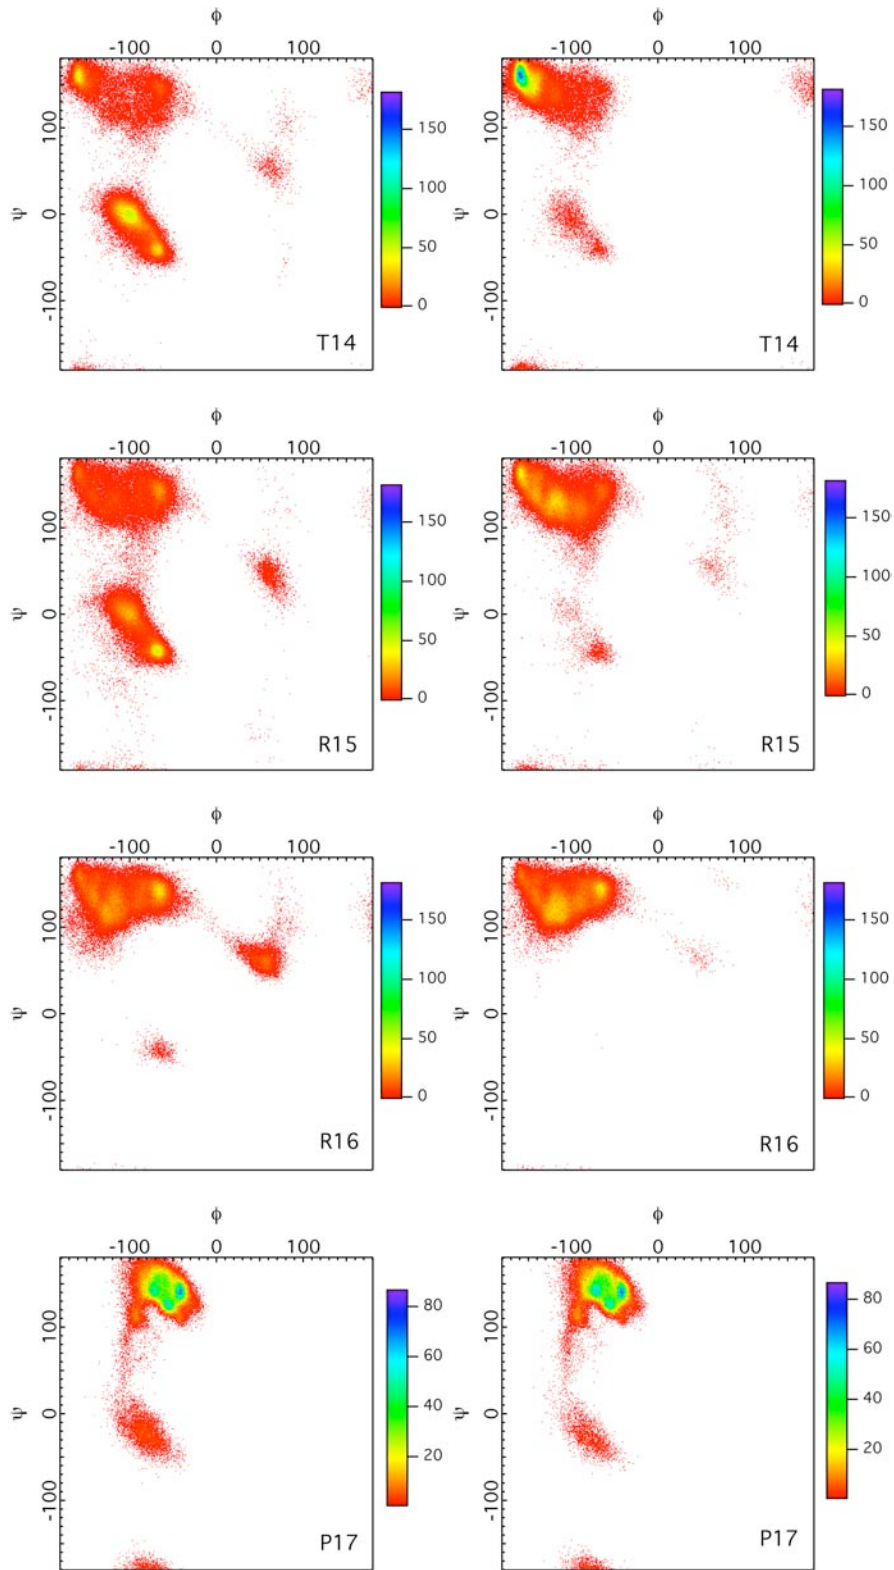

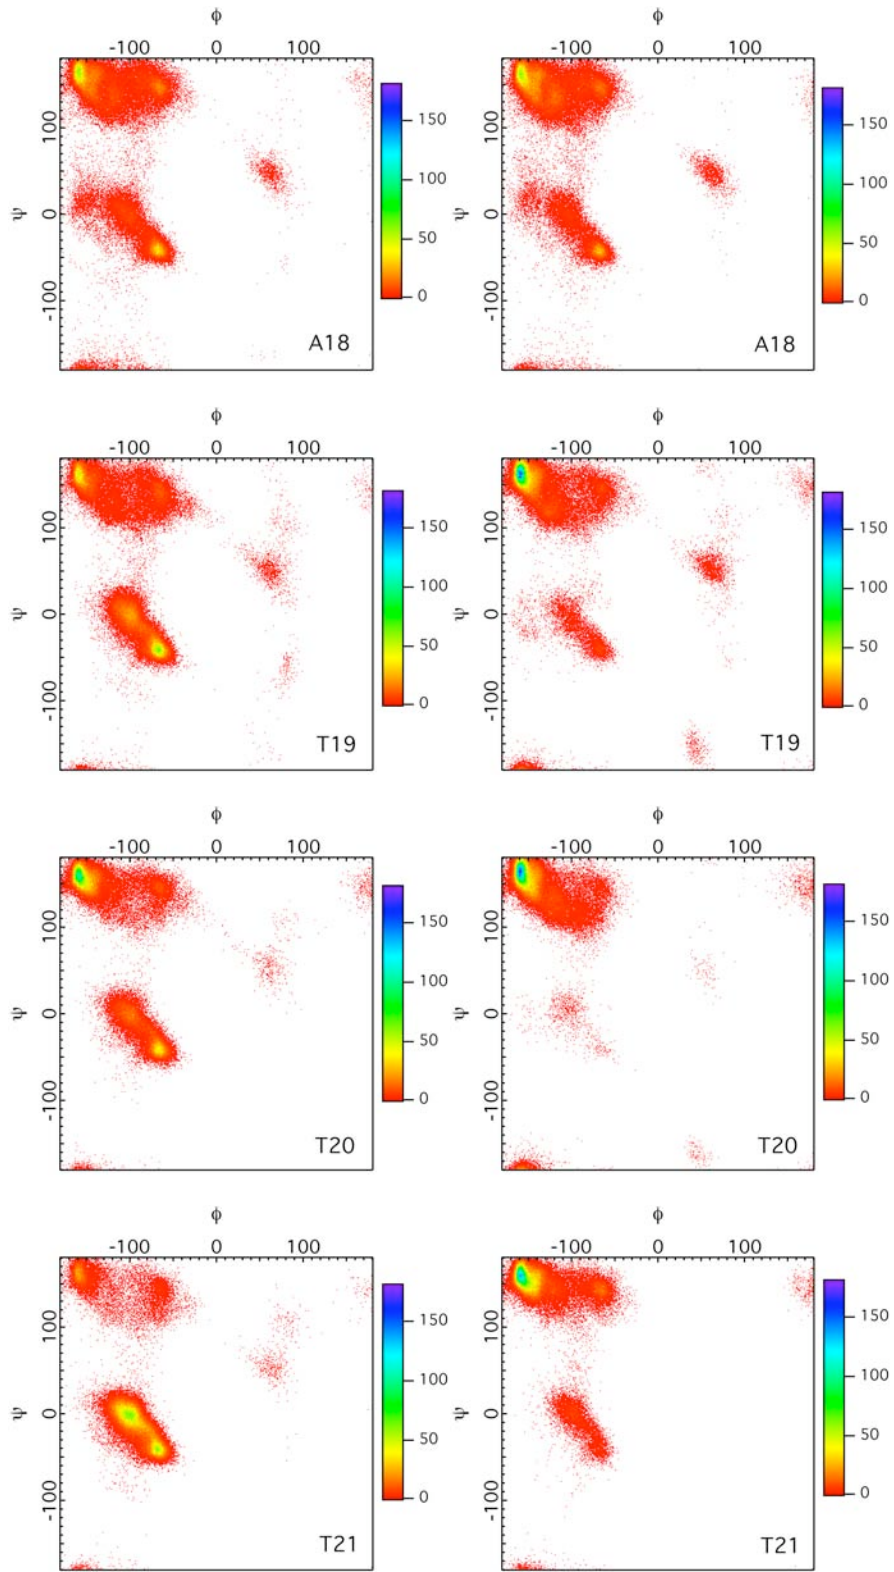

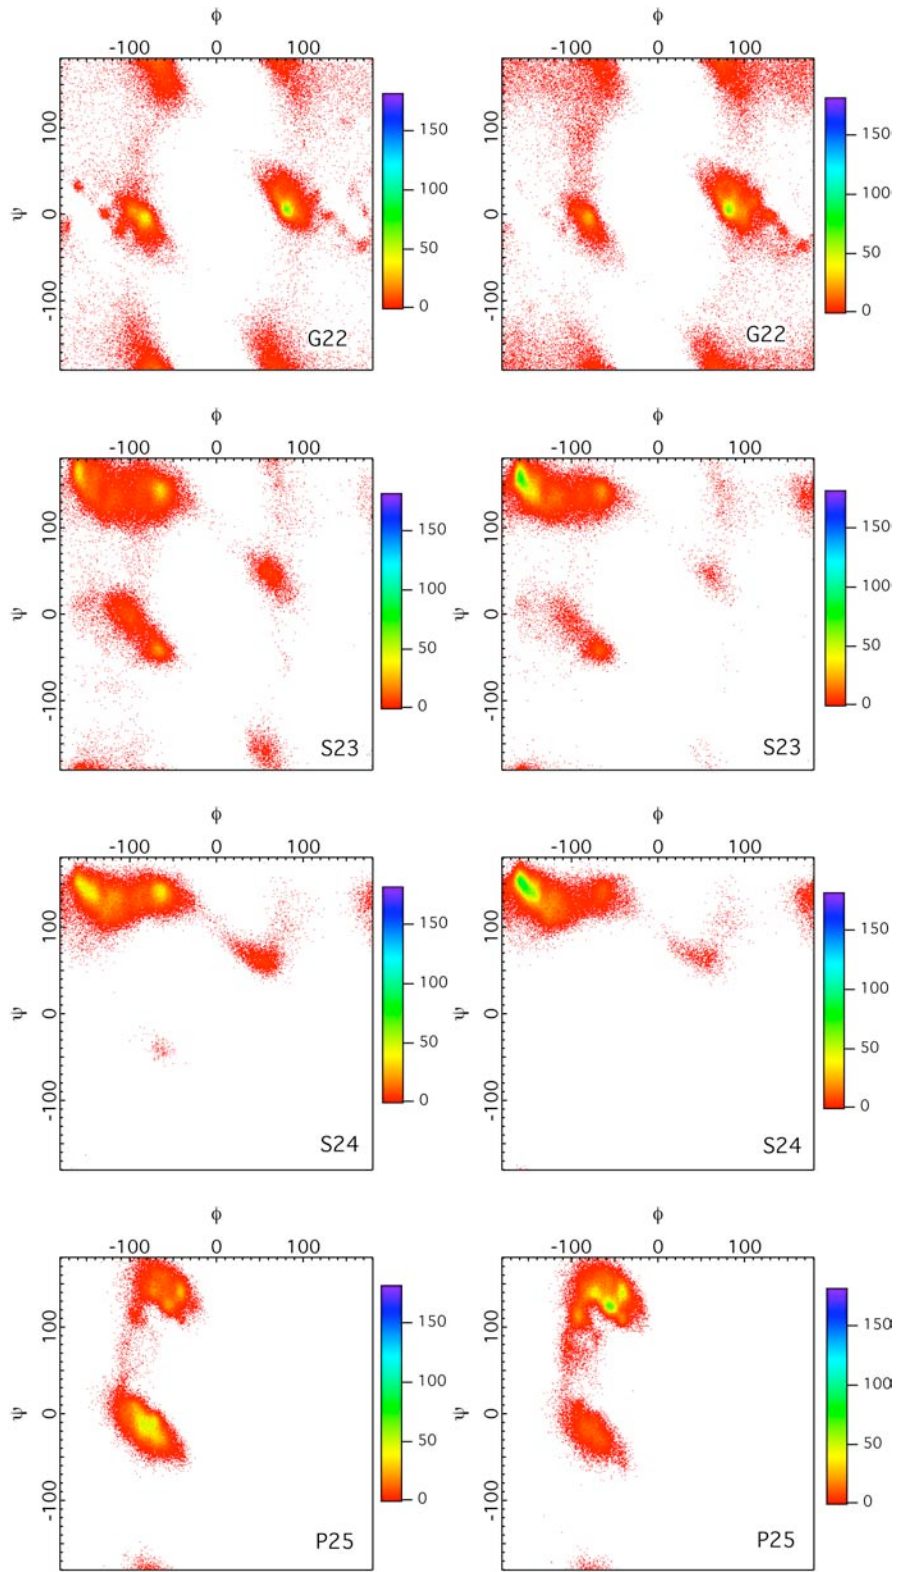

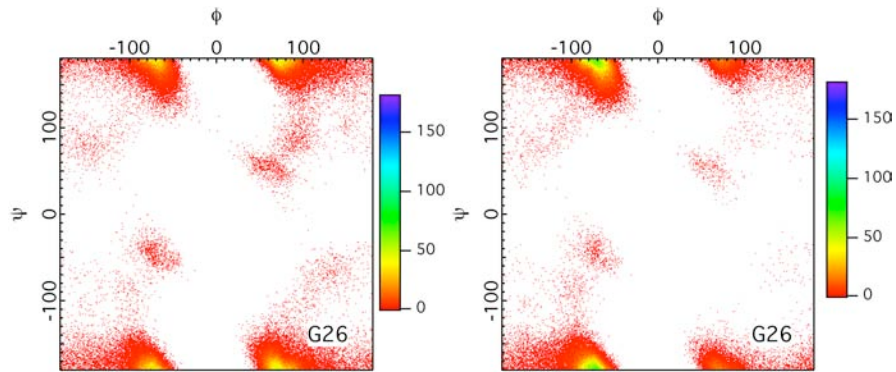

Figure S3. Ramachandran maps for the residues in the *T. reesei* Cel7A non-glycosylated and glycosylated linkers. The left map is from the non-glycosylated linker and the right map is from the glycosylated linker. Each map is on the same scale. The maps are labeled with the residue type and number. These data are taken from the REMD simulations.

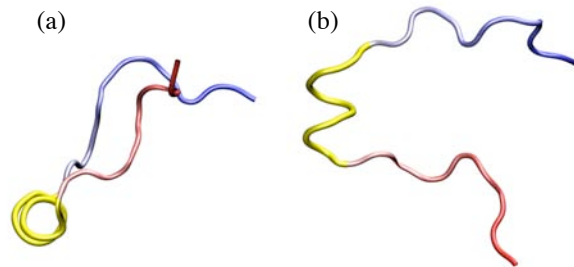

Figure S4. An alpha helix, highlighted in yellow, forms in the REMD simulations of the non-glycosylated Cel7A linker. The linker is shown in backbone shading from the N-terminal in red to the C-terminal in blue. (a) Front view down the helix. (b) Side view of the helix. From the REMD simulations, it is expected that this conformation is relatively thermodynamically equivalent to an extended conformation, and does not form in the glycosylated Cel7A linker REMD simulations.

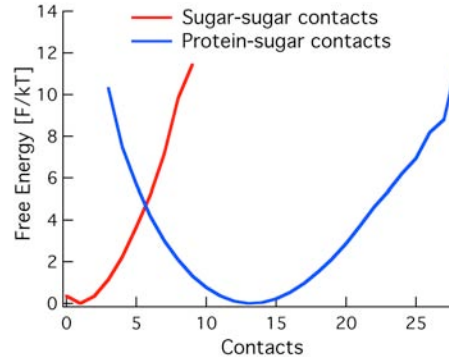

Figure S5. The free energy of the glycosylated Cel7A linker as a function of sugar-sugar contacts and protein-sugar contacts. As shown, there are few glycan-glycan interactions whereas there are a substantial number of non-sequential protein side chain interactions with the glycosylation. This figure implies that there are few sugar-sugar native contacts throughout the linker (non-covalent interactions), with more long-lived protein-sugar (again, non-covalent) interactions.

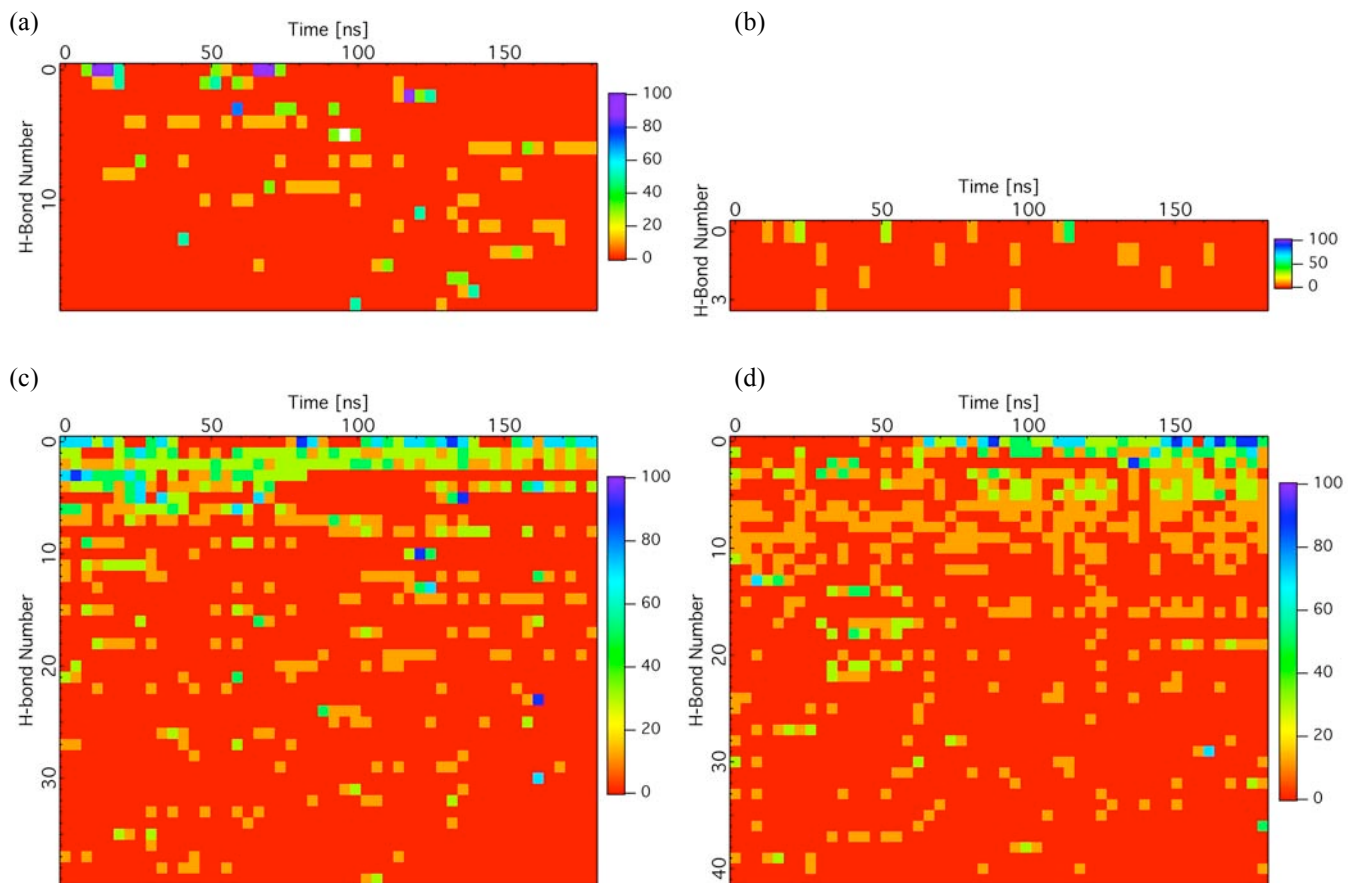

Figure S6. Hydrogen bonding lifetime diagrams as a function of time for a 180 ns of continuous MD simulation. The color contours represent the percentage lifetime of a given hydrogen bond within a window of 1.5 ns. (a) Protein-protein hydrogen bonds for the non-glycosylated linker. (b) Protein-protein hydrogen bonds for the glycosylated linker. (c) Protein-sugar hydrogen bonds for the glycosylated linker. (d) Sugar-sugar hydrogen bonds for the glycosylated linker.

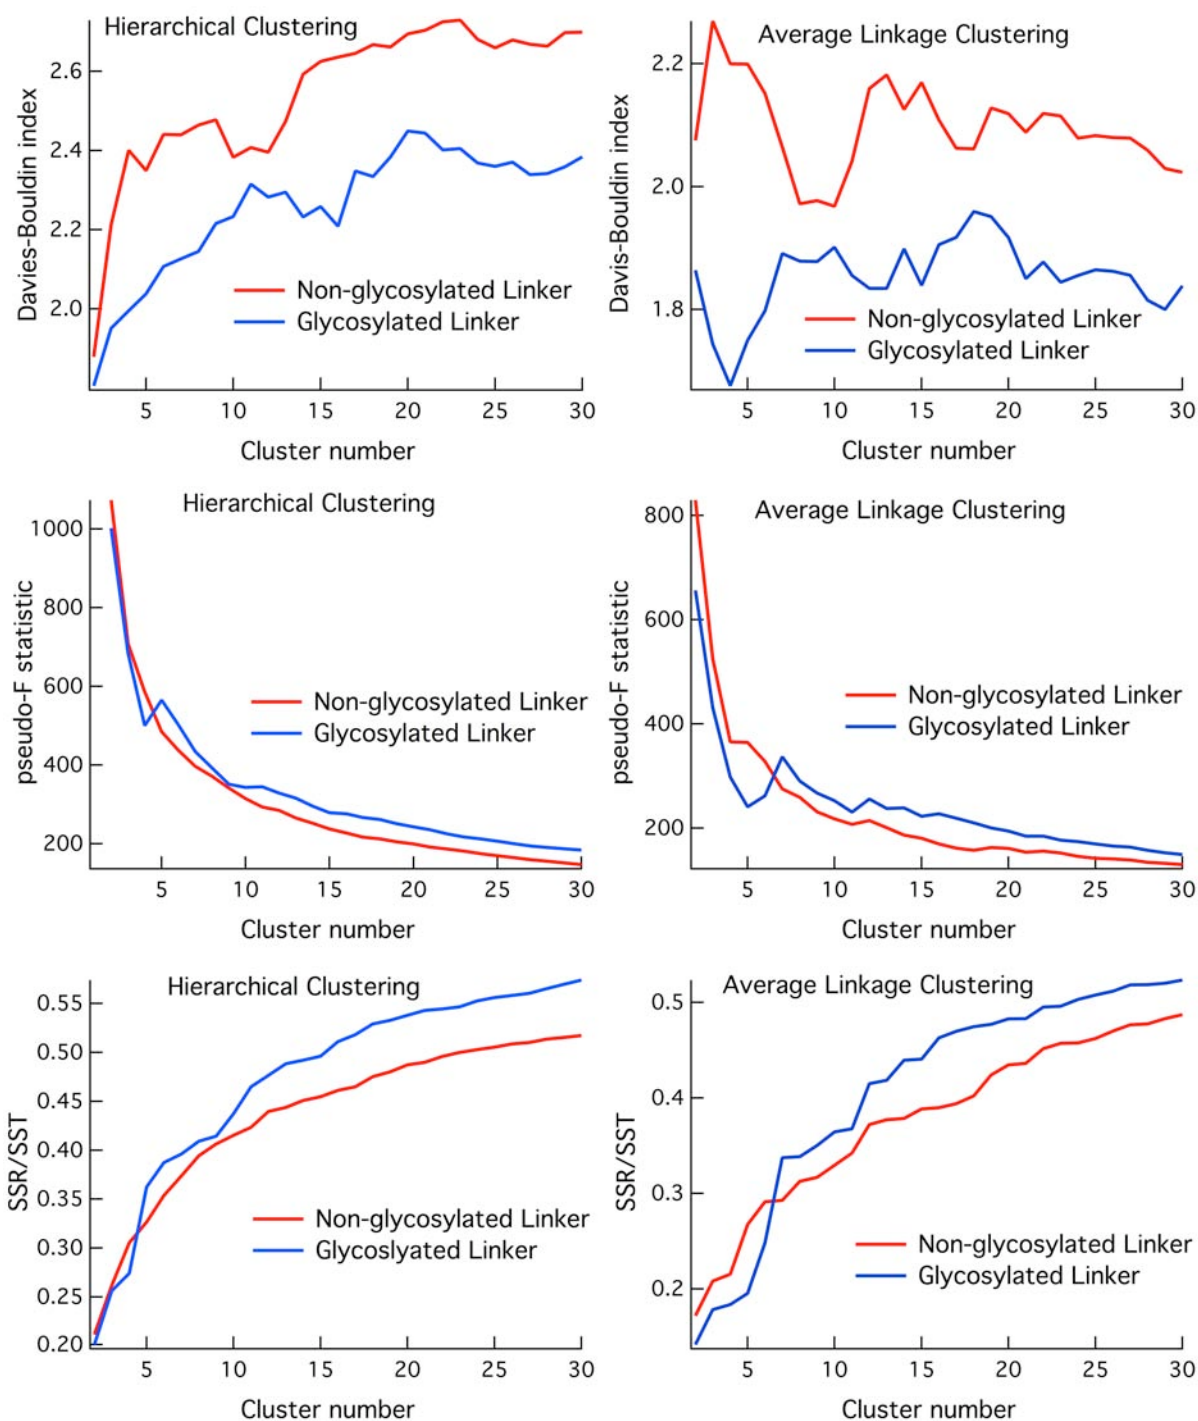

Figure S7. Clustering metric results for the REMD simulations with the hierarchical and average linking algorithms for the non-glycosylated and glycosylated linkers. These metrics are all useful for determining the optimal number of structural clusters found by REMD. For the results shown here, these diagrams illustrate that there are no significantly populated, distinct structural clusters of the *T. reesei* Cel7A linker.

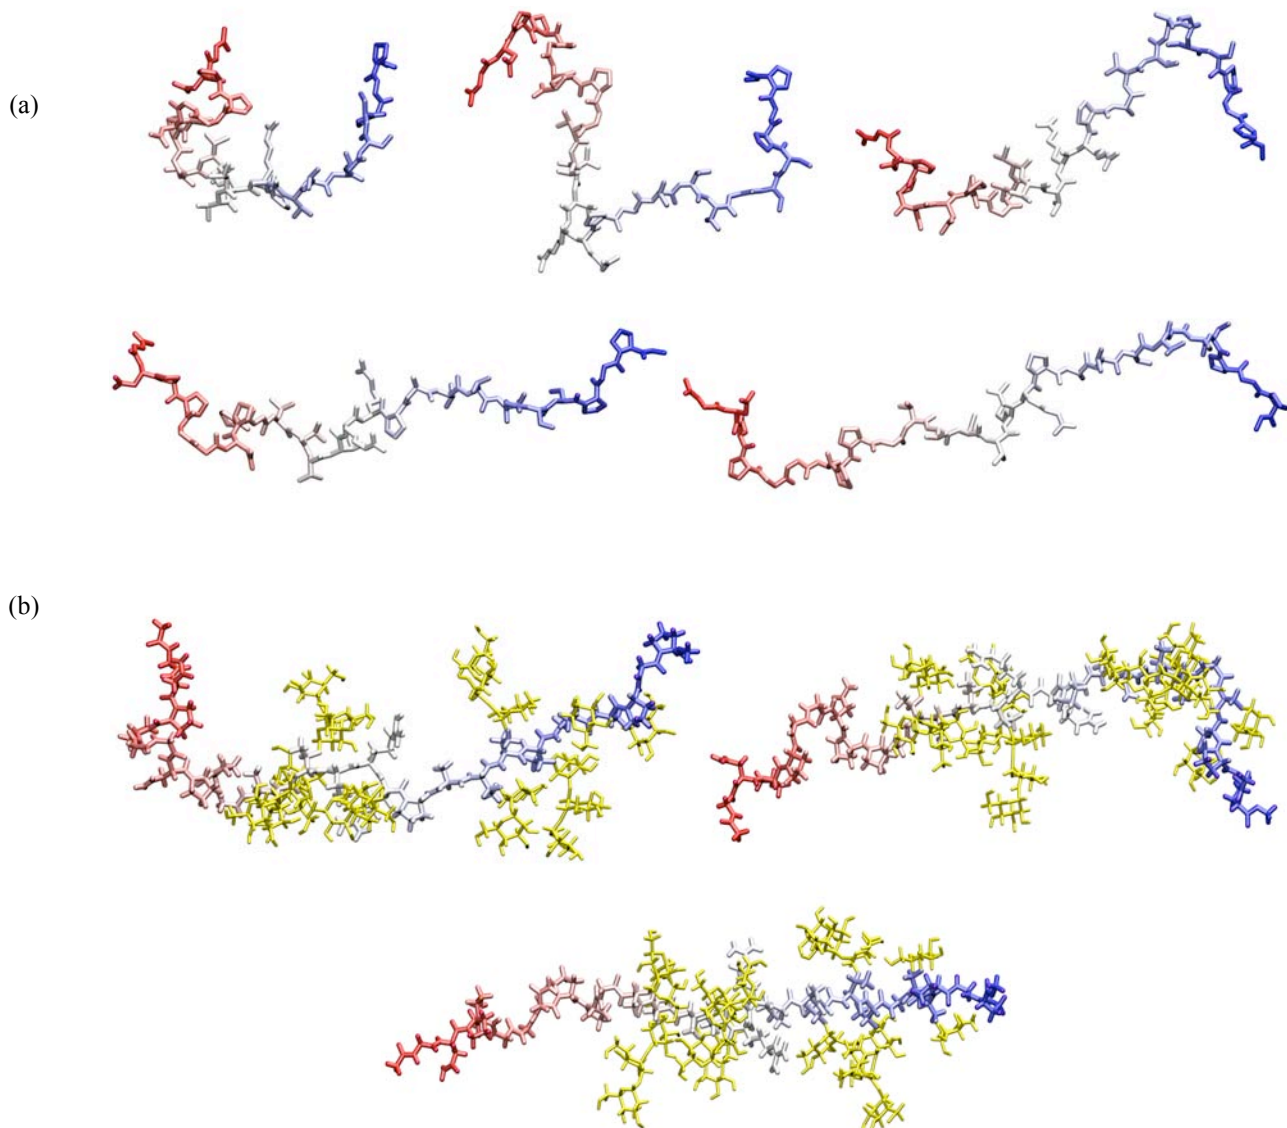

Figure S8. The *T. reesei* Cel7A linker displays significant conformational flexibility. (a) The non-glycosylated linker at different end-to-end distances. From left to right: R=18, 33, 44, 56, and 66 Å. (b) Various conformations of the glycosylated linker. From left to right: R=55, 62, and 69 Å. The linker peptide is colored from red at the N terminus to blue at the C terminus. Sugars are shown in yellow.

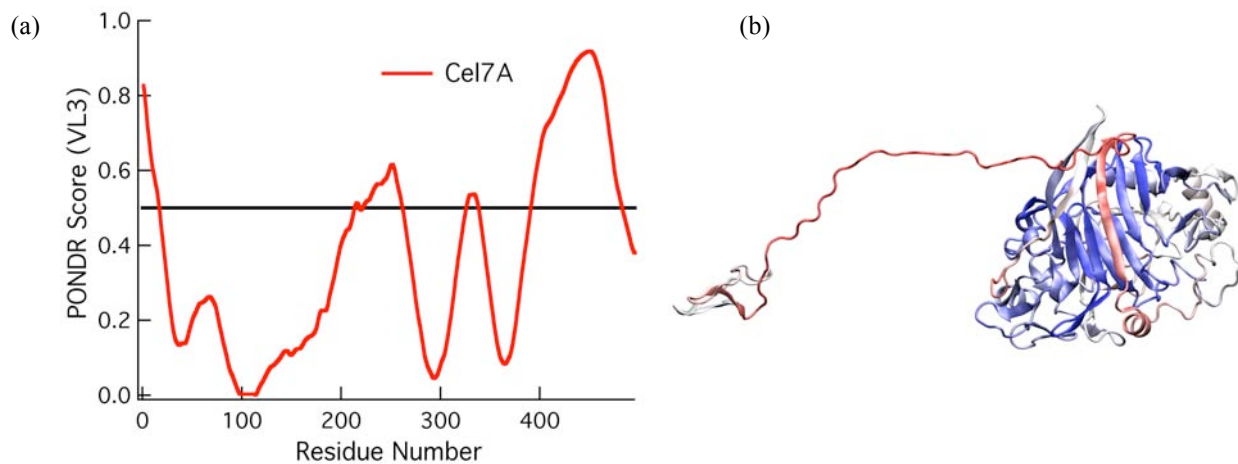

Figure S9. Sequence-based PONDR screen for protein disorder applied to the entire *T. reesei* Cel7A enzyme. The linker is approximately from residues 430 to 460. (a) The VL3 algorithm (58) predicts the Cel7A linker to be a disordered region. (b) The Cel7A enzyme colored by VL3 score from Figure 8(a) where the minimum score is 0 (blue) and the maximum VL3 score is 1.0 (red).



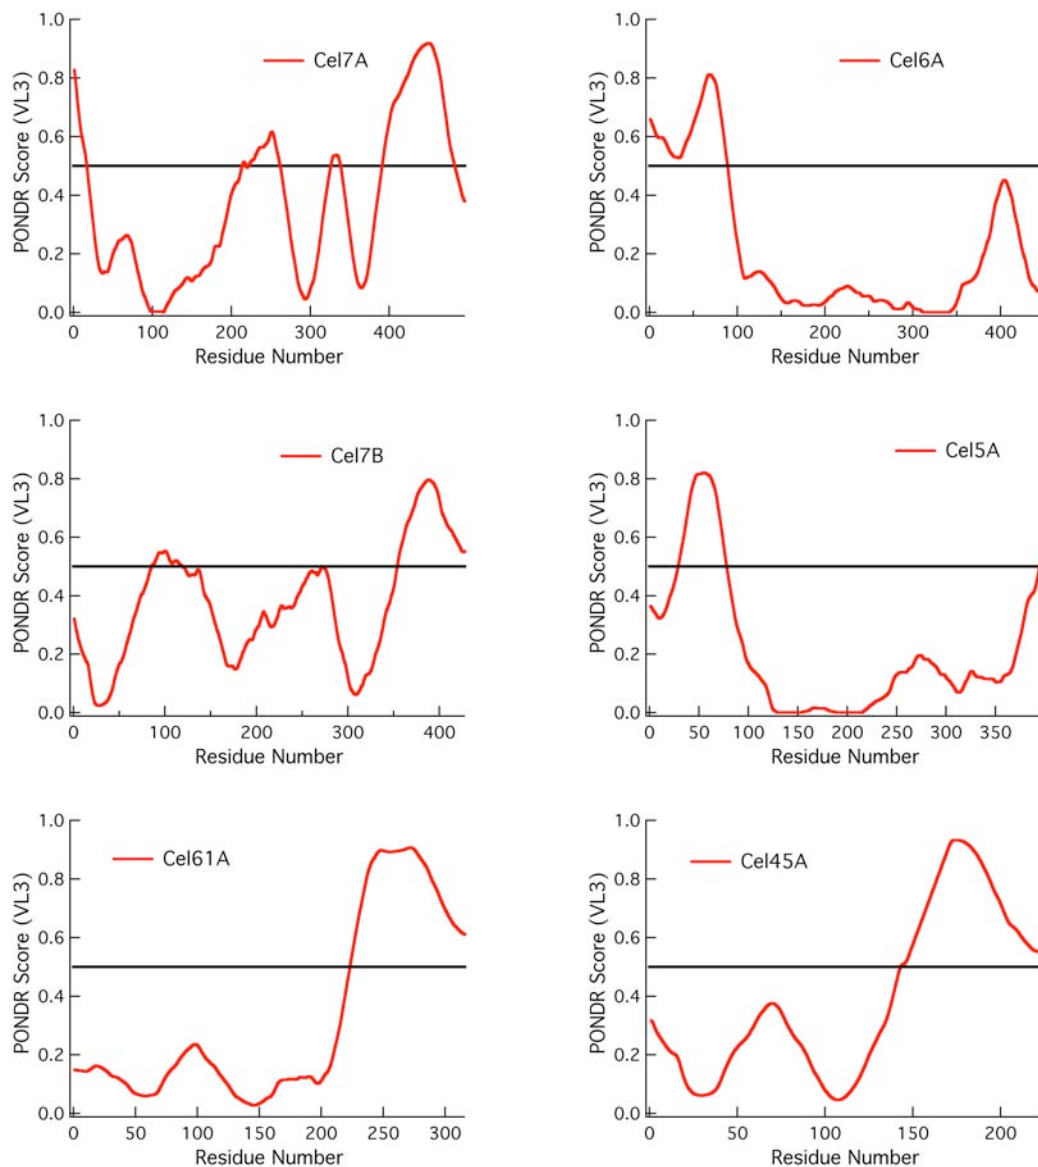

Figure S10. Predicted regions of disorder from the VL3 PONDR algorithm for the *T. reesei* Cel7A cellulase, *T. reesei* Cel6A cellulase, *T. reesei* endoglucanase I or Cel7B, *T. reesei* endoglucanase II or Cel5A, *T. reesei* endoglucanase IV or Cel61A, and *T. reesei* EGV endoglucanase or Cel45A. Signal sequences were removed in all cases. For all of the cellulases shown here, the VL3 PONDR algorithm predicts the linker regions both as the most disordered regions in the protein and as an intrinsically disordered protein as measured by the VL3 score significantly above 0.5.

***T. reesei* Cel6A**

qacssvwgqc ggnwsgptc casgstcvys ndyysqclpg aasssstra asttsrvspt  
tsrsssatpp pgstttrvpp vsgstatysg npfvgvtpwa nayyasevss laipsltgam  
ataaaaavakv psfmwldtld ktplmeqtla dirtankngg nyagqfvvyd lpdrdcaala  
sngeysiadg gvakyknyid tirqivveys dirtllviep dslanlvtnl gtpkcanaqs  
aylecinyav tqlnlpnvam yldaghagwl gwpanqdpaa qlfanvykna sspralrgla  
tnvanynawn itsppsytqg navyneklyi haigpllanh gwsnaffitd qgrsgkqptg  
qqqwgdwcnv igtgfgirps antgdslls fvwvkpgec dgtsdssapr fdshcalpda  
lqpapqagaw fqayfvqlt nanpsfl

***T. reesei* endoglucanase I, Cel7B**

rwmhdanyns ctvnggvntt lcpdeatcgk ncfiegvdya asgvttsgss ltmnqympss  
sggyssvspr lyllsdghey vmlklnqel sfdvdlalp cgengslyls qmdengganq  
yntaganygs gydaqcpvq twrngtlnts hqgfccnemd ilegnsrana ltphsctata  
cdsagcgfnp ygsgyksygg pgdvtvtskt ftitqfntd ngspsgnlvs itrkyqqngv  
dipsaqpggd tisscpsasa ygglatmgka lssgmvlvfs iwndnsqymn wldsgnagpc  
sstegnpsni lannpnhvv fsnirwgdig sttnstapp ppasssttfst trrssttss  
psctqthwgg cggigysgck tctsgttcgy ndyysqcl

***T. reesei* endoglucanase II, Cel5A**

qqtvwgqcg gigwsgptnc apgsacstln pyyaqcipgat tittstrpps gpttttrats  
tssstppsts sgvrfragvni agfdfgcttd gtcvtskvypp lknftgsnny pdgigqmghf  
vnedgmtifr lpvgwqylv nnnlgnlds tsiskydqlvq gclslgayci vdihnyarwn  
ggiiggggpt naqftslws qlaskyasqs rvwfgimneph dvnintwaat vqevvtairn  
agatsqfisl pgndwqsag afisdgsaaa lsqvtvndgst tnlifdvhky ldsdngtha  
ecttnnidga fsplatwlr qnnrqailte tgggnvqsciq dmcqqiqyln qnsdvylgyv  
gwgagsfdst yvltetpts sgnswtetsl vssclark

***T. reesei* endoglucanase IV, Cel61A**

dngfvspday qnpdiichkn atnakghasv kagdtilfqw vpvwpwhpgp ivdylancng  
dcetvdkttl effkidgvgl lsggdpgtwa sdvlisnnt wvkipdnla pgnyvlrhei  
ialhsagqan gaqnyqcfn iavsgsgslq psgvlgtldy hatdpgvlin iytsplnyii  
pgptvvsqgl tsvaaggssaa tatasatvpg gsgsptsrnt ttarttqass rpsstppatt  
sapaggtqt lygqcgsgy sgptrcappa tctstlnpyya qcln

***T. reesei* endoglucanase V, Cel45A**

aykatttryy dggegacgcy sssgafpwql gigngvytaa gsqalfdtag aswgcgagcgk  
cyqltstgga pcsscgtgga agqsiivmvt nlcpnngnaq wcpvvggtng ygysyhfdim  
aqneifgdnv vdfepiacp gqaasdwgvc lcvqqgetdp tpvlgndtgs tppgssppat  
sssppsgggq qtlygqcgga gwtgpttcqa pgtckvqnqw ysqclp

Figure S11. Sequences of the *T. reesei* cellulases examined in the charge-hydrophathy scale. The linkers screened in this algorithm are highlighted in yellow. Signal peptides are not shown for all sequences. The boundaries between the linker and the CBM as well as the linker and the catalytic domain are taken from the gene annotations. The sequences of the Family 1 CBMs are highlighted in light blue.

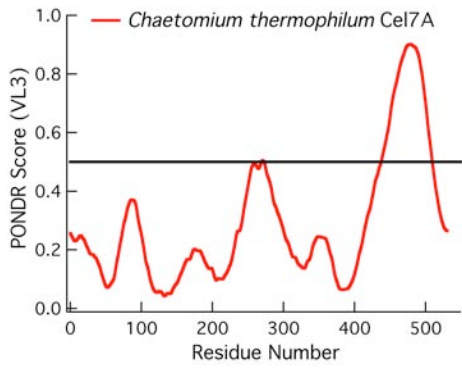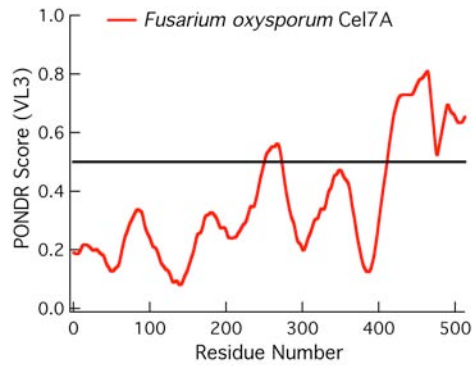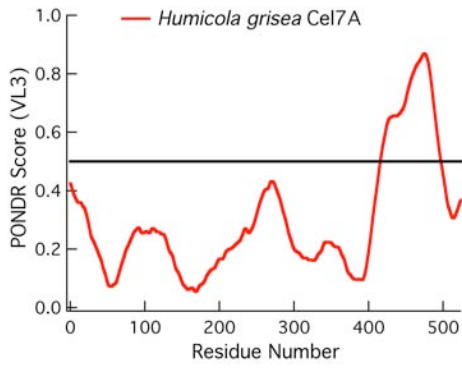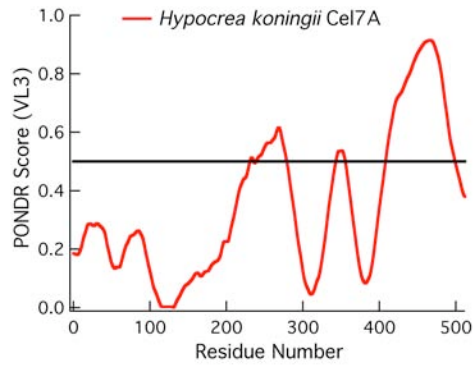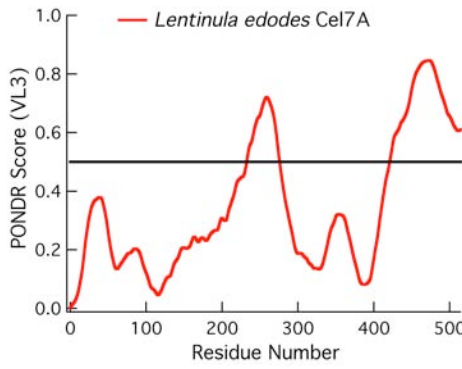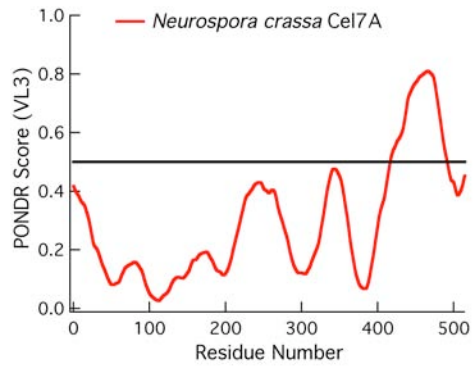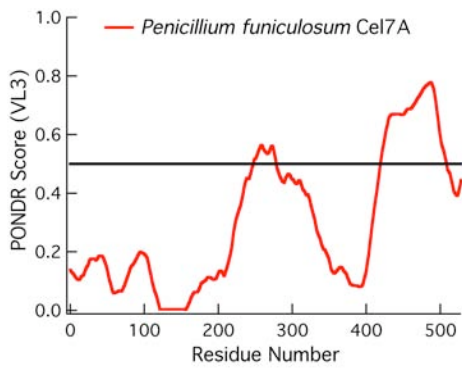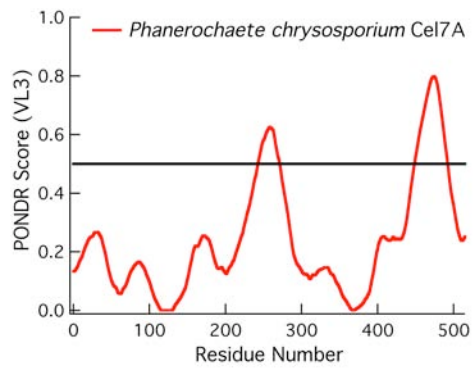

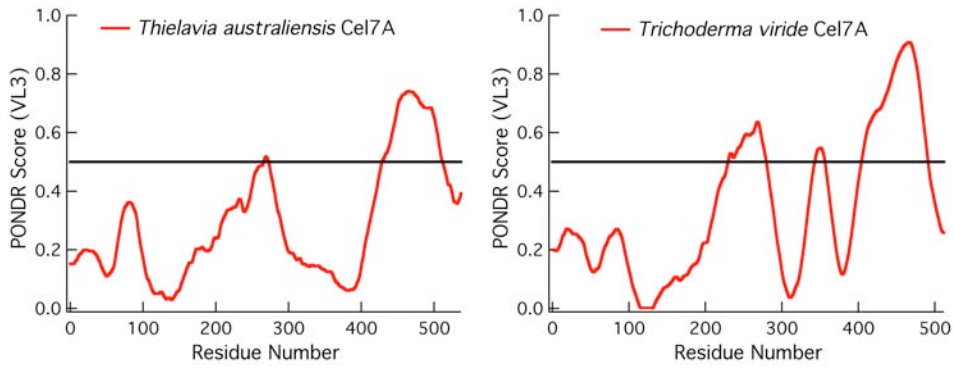

Figure S12. Predicted regions of disorder from the VL3 PONDR algorithm for multiple Family 7 cellobiohydrolases from different fungal species. In all cases, the linker regions are predicted to be disordered.

***Chaetomium thermophilum* Cel7A**

mmykkfaala alvagasagg acsltaenhp sltwkrctsg gscstvngav tidanwrwth  
tvsgstncyt gnqwdtslct dgkscaqtcc vdgdyssty gittsgdsln lkfvtkhgyg  
tnvgsrvylm endtkyqmfe llgneftfdv dvnslgcgln galyfvsmada dggmskysgn  
kagakygtgy cdaqcprdlk fingeanvgn wtpstndana gfgrygscs emdvweannm  
ataftphpct tvgqsrcead tccgtyssdr yagvcdpdgc dfnaysrggdk tfygkgmtvd  
tnkkmtvvtq fhknsagvls eikrfyvqdg kiianaeski pgnpgnsitq eycdaqkvaf  
sntddfnrkg gmaqmskala gpmvlvmsvw ddhyanmlwl dstypidqag apgaergacp  
ttsgvpaieie aqvpnsnvif snirfgpigs tvpgldgsnp **gnptttvpp aststsrpts**  
**stsspvstpt gqpggcttqk wggcggigyt gctncvagtt ctqlnpwysq cl**

***Chrysosporium lucknowense* Cel7A**

myakfatlaa lvagaaaqna ctltaenhrs ltwskctsgg sctsvqgsit idanwrwthr  
tdsatncyeg nkwdtsycsd gpascaskcci dgadyssty ittsgnsln kfvtkgqyst  
nigsrtylme sdtkyqmfql lgneftfdvd vsnlgcgln alyfvsmada dggmskysgnk  
agakygtgy dsqcprdlkf ingeanvenw qsstndanag tgkygscse mdvweannma  
aafthpccxv igqsrcegd cggtystdry agicdpdgd fnsyrqgnkt fygkgmtvdt  
tkkitvvtqf lknsagelse ikrfyvqngk vipnsestip gvegnsitqd wcdqrkaafg  
dvt dxqdkgy mvqmgkalag pmlvmsiwd dhavnmlwld stwpidgagk pgaergacpt  
tsgvpaevae eapnsnvifs nirfgpigst vsglpdggsg **npnppvsst pvpssttss**  
**gssgptggtg vakhyeqcg igftgptqce spytctklnd wysqcl**

***Fusarium oxysporum* Cel7A**

myrivatasa liaaaraqqv cslntetkpa ltwskctssg csdvkgsvvi danwrwthqt  
sgstncytgn kwtdsictdg ktcaekccl d gadysgtygi tssgnqlslg fvtngpyskn  
igsrtylmen entyqmfql gneftfdvdv sgigcglnga phfvsmdedg gkakygnka  
gakygtgycd aqcprdvkfi ngvansegwk psdsdnagv gnlgtccpem diweansist  
aftphpctkl tqhsctgdsc ggtysdryg gtcdadgdcf naysrggnktf ypggsnfnid  
ttkkmtvvtq fhkgsngrls eitrlvqng kvianseski agnpgsslts dfcskqksvf  
gdiddfskkg gwngmsdals apmlvmslw hdhhsnmlwl dstyptdstk vgsqrgscat  
tsgkpsdler dvpsnkvsfs nikfgpigst yksd **gttpnp passsttgss tptnppagsv**  
**dqwgqcggn ysgpttcksp ftckkindfy sqcq**

***Humicola grisea* Cel7A**

mrtakfatla alvasaaagg acslttherhp slswnkctag gqcqtvqasi tldsnwrwth  
qvsgstncyt gnkwtdsict dakscagncc vdgadytsty gittngdsls lkfvtkgqhs  
tnvgsrtyl dgedkyqtfe llgneftfdv dvnslgcgln galyfvsmada dgglsrypgn  
kagakygtgy cdaqcprdik fingeanieg wtgstdpna gagrygtccs emdiweannm  
ataftphpct iigqsrcegd scggtysner yagvcdpdgc dfnsyrqgnk tfygkgmtvd  
ttkkmtvvtq flkdangdlg eikrfyvqdg kiipnsesti pgvegnsitq dwcdqrkvaf  
gdiddfnrkg gmkqmgkala gpmvlvmsiw ddhasnmlwl dstfpvdaag kpgaergacp  
ttsgvpaevae aeapnsnvf snirfgpigs tvaglp **gagn ggnggnppp ptttssapa**  
**ttttasagpk agrwqcggi gftgptqcee pyictklndw ysqcl**

***Hypocrea koningii* Cel7A**

myrklavisa flataraqsa ctlqsethpp ltwqkcsgg tctqqtgsyv idanwrwtha  
tnsstncydg ntwsstlcpd netcakncc dgaayasty vttsgnslsi gfvtsaqkn  
vgarlylmas dttyqeftll gnefsfdvdv sqlpcglnga lyfvsmadag gvskypnta  
gakygtgycd sqcprdlkfi ngqanvegwe pssnantgi gghgscsem diweansise  
altphpcttv gqeicegdgc ggtysdnryg gtcddpdgdw npyrlgntsf ypggssftld  
ttkkltvvtq fetsgainry yvqngvtfqg pnaelgsysg nelnddycta eeaeeggssf  
sdkggltsqfk katsgmvlv mslwddyyan mlwldstypt netsstpgav rgscstssgv  
paqvespspn akvtfsnikf pigstgnps **ggnggnppp ttttrrpatt tgsspgptqs**  
**hyqcgigiy sgptvcasgt tcqvlppyys qcl**

***Lentinula edodes* Cel7A**

mfrtaallsf aylavvygqg agtstaethp pltweqctsg gscttgsssv vldsnwrwth  
vvggytncyt gnewnttvcg dgttcaanca ldgadyegty gistsgnalt lkfvtaaqg  
nvgsrvylma pgseteyqmf nplnqeftfd vdvshalpcgl ngalyfsemd adgglseypt  
nkagakygtg ycdsqcprdi kfiegkanve gwtpsstspn agtgggtgicc nemdiweans  
isealtphpc taqggactg dscsspnta gicdqagcdf nsfrmgdtsf ypggltvdt  
skitvvtqfi tsdntttgdl tairriyvqn gqvignsmnsn iagvtptnei ttdfcdqgkt  
afgdntntfse kggltgmgaa fsrgmvlvls iwdddaaeml wldstypvgk tgpagaargtc  
attsgqpdqv etqspnaqvv fsnikfgaig stfssstgtgt gtgtgtgtgt gtttssapaa  
tqtkygqcgq qgwtgatvca sgstctssgp yysqcl

#### *Neurospora crassa* Cel7A

mrasllafsl aaavaggqqa gtltakrhp s ltwqkctrng cptlnttmvl danwrwthat  
sgstkcytgn kwqatlcpdg kscaancald gadytgtygi tsgswsltlq fvtdnvgara  
ylmaddtqyq mlellngelw fdvdmsnipc glngalylsa mdadggmrky ptnkagakya  
tgycdaqcpr dlkyingian vegwtpstnd angigdhgsc csemdiwean kvstaftph  
cttieghmce gdscggtyds drygvlcdad gcdfnsyrmg nttfygegkt vdtsskftv  
tqfikdsagd laeikafyvq ngkviensqs nvdgvsngsi tqsfcksqkt afgdiddfnk  
kgglkqmgka laqamvlvms iwddhaanml wldstypvpk vpgayrgsgp tsgvpaevd  
anapnskvaf snikfghlgi spfsggssgt ppsnpssas ptsstakpss tstasnpstg  
gaahwaqcgq igfsgpttcp epytcakhdh iysqcv

#### *Penicillium funiculosum* Cel7A

msalnsfnmy ksalilgsl1 atagaqqigt ytaethpsls wstcksggsc ttngaitld  
anwrwvhgvn tstnctygtnt wntaicdtda scaqdcaldg adysgtygit tsgnslrlnf  
vtgsnvgsrt ylmadnthyy ifdllnqeft ftvdvsnlpc glngalyfvt mdadggvsky  
pnnkagaqyg vgycdsqcpr dlkfiagqan vegwtpstnn sntgignhgs ccaeldiwea  
nsisealtph pcdtpgltvc taddcggtys snryagtdcp dgcdfnpyrl gvtdfygsgk  
tvdttkpftv vtqfvtdgdg ssgslseirr yyvqngvip qpsskisgis gnvinsdfca  
aelsafgeta sftnhgglkn mgsaleagmv lvmslwddys vnmlwldsty panetgtpga  
argscpttsg npktvesqsg ssvvvsdik vgpfnstfsg gtstggsttt tasgttstka  
sttststst gtgvaahwgq cggqgwtgpt tcasgttctv vnpyysqcl

#### *Phanerochaete chrysosporium* Cel7A

mfrtatllaf tmaamvfqgq vgtntaenhr tltsqkctks ggcsnlntki vldanwrwlh  
stsgytncyt gnqwdatlcp dgktcaanca ldgadytgty gitasgsslk lqfvtsngv  
srvymladdt hyqmfqllnq eftfdvdmsn lpcglngaly lsamdadggm akypnkaga  
kygtgycdsq cprdikfing eanvegwnat sanagtgnyg tcctemdiwe anndaaaytp  
hpcttnaqtr csgsdctrdt glcdadgcdf nsfrmgdqt f lgkglvtvdt kpftvvtqfi  
tndgtsagtl teirrllyvqn gkviqns svk ipgidpvnsi tdnfcsqqkt afgdnyfaq  
hgglkqvgea lrtgmvlals iwddyaanml wldsnypntk dpstpgvarg tcattsgvpa  
qieaqspnay vvfsnikfgd lnttytgtvs sssvssshss tstssshss stpptqptgv  
tvpqwgqcgq igytgsttca spytchvlnp yysqcy

#### *Thielavia australiensis* Cel7A

myakfatlaa lvagasaqav csltaethps ltwqkctapg sctnvagsit idanwrwthq  
tssatncysg skwdssicct gtdcaskcci dgaeyssstyg ittsgnalnl kfvtkgqyst  
nigrstylme sdtkyqmflk lgnftfdvd vsnlgcglng alyfvsmdad ggmskysgnk  
agakygtgyc daqcprdlkf ingeanveg w esstndanag sgkygsccte mdvweannma  
taftphpc t igqtrcegd t cggyssdry agvcdpdgcd fnsyrqgnkt fygkgmtvdt  
tkkitvvtqf lknsagelse ikrfyaqdgk vipnsestia gipgnsitka ycdaqktvfq  
ntddftakgg lvqmgkalag dmvlvmsvwd dhavnmlwld styptdqvgv agaergacpt  
tsgvpsdvea napnsnvifs nirfgpigst vqglpssgg t ssssaapqs tstkasttts  
avrttstatt ktssapaqg tntakhwqgc gngwtgptv cespykctkq ndwysqcl

#### *Trichoderma viride* Cel7A

myqklalisa flataraqsa ctlqaethpp ltwqkcssg tctqqtgsvv idanwrwtha  
tnsstncydg ntwsstlcpd netcaknccl dgaayastyg vttsadslsi gfvtsaqkn

```

vgarlylmas dtttqeftll gnefsfdv dv sqlpcglnga lyfvsmdadg gvtkypnta
gakygtgycd sqcprdlkfi ngqanvegwe pssnnantgi gghgscsem diweansise
altphpcttv gqeicegdsc ggtysgdryg gtcddpdgdw npyrlgntsf ygggssftld
ttkkltvvtq fetsgainry yvqngvtfq pnaelgdysg nsldddyc aa eeaeffggssf
sdkggltqfk katsggmvlv mslwddy yan mlwldstypt detsstpgav rgssstssgv
paqlesnspn akvvysnikf gpigstgnps ggnppgg npp gtttprpats tgsspgptqt
hyggcggigy igptvcasgs tcqvl npyys qcl

```

Figure S13. Sequences of other processive Family 7 cellobiohydrolases examined in the charge-hydropathy scale. The linkers screened in this algorithm are highlighted in yellow. The sequences of the Family 1 CBMs are highlighted in light blue. The boundary between the linker and the CBM are taken from the homology of the Family 1 CBMs in these organisms and *T. reesei* Cel7A. The boundary between the linker and the catalytic domain is less well defined.

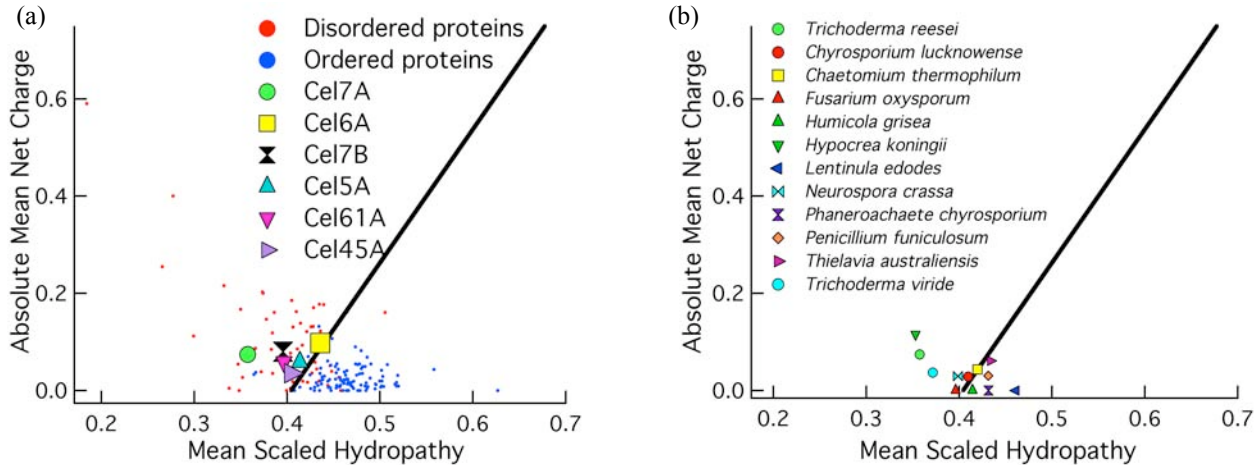

Figure S14. (a) Charge as a function of hydropathy for the Cel7A, the Cel6A and the four *T. reesei* endoglucanases linkers. The training sets for disordered and ordered proteins are shown in red and blue, respectively from (58). (b) Charge as a function of hydropathy for a library of Cel7A enzymes from other organisms. The black lines show the approximate delineation between ordered and disordered proteins.
